# Supplementary material
Source: PubMed Central journal article supplement (PMC8112248)
Supplement: NIHMS604786-supplement-01.pdf [file NIHMS604786-supplement-01.pdf]

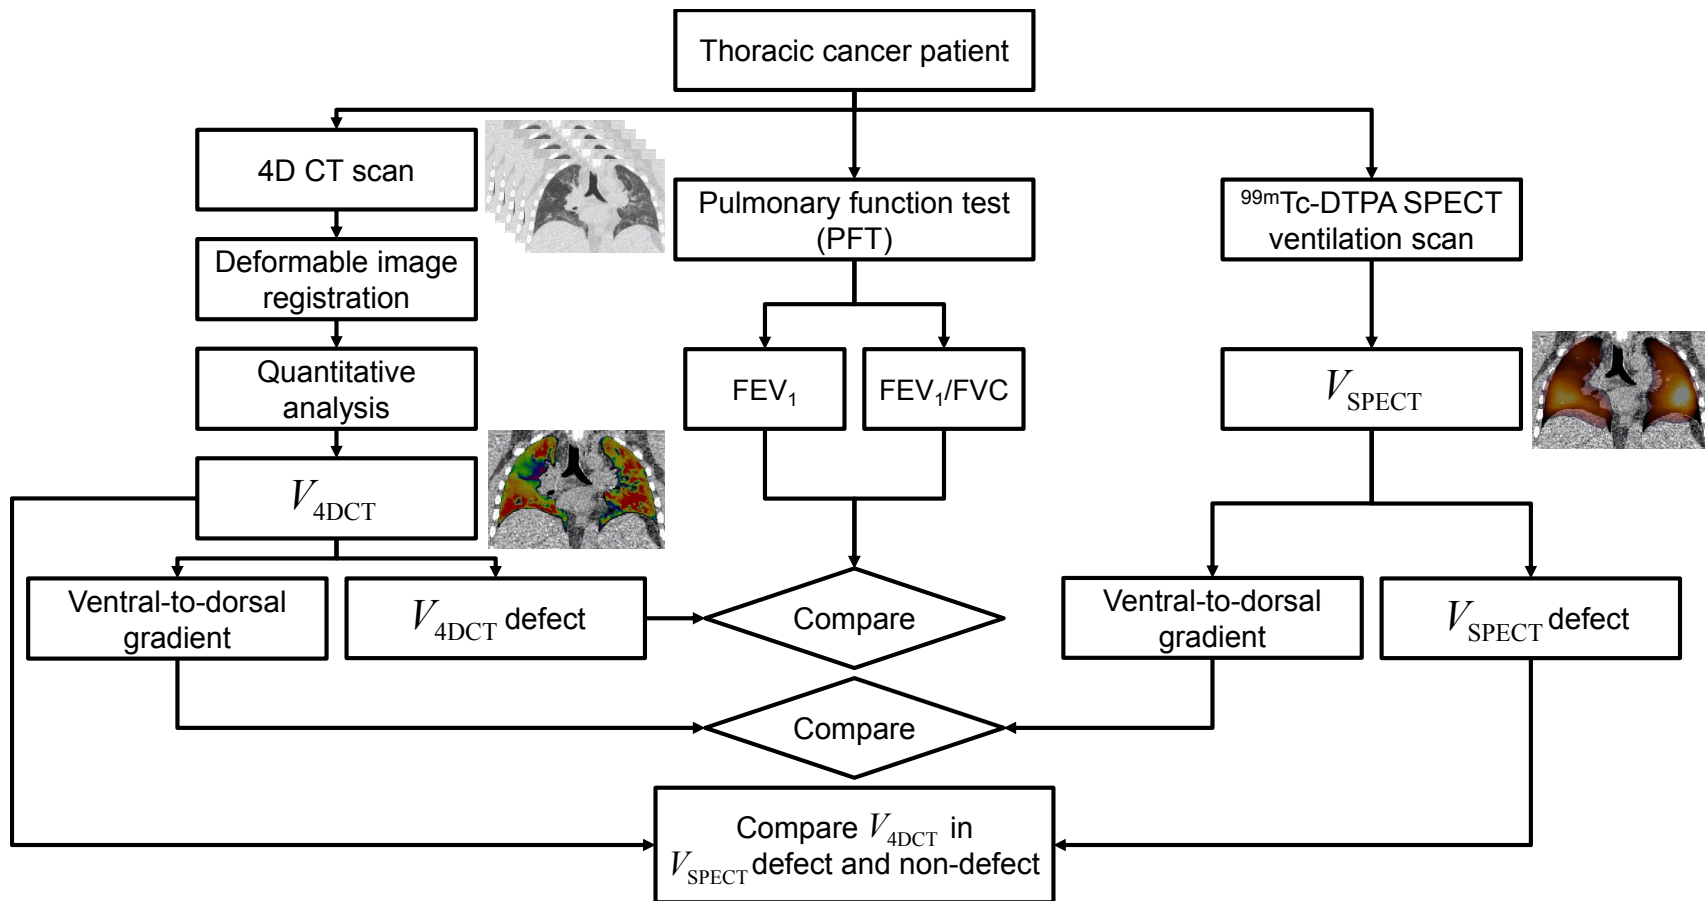

**Figure e1.** A schematic diagram for creating a 4D-CT ventilation image ( $V_{4DCT}$ ) and comparing with pulmonary function test (PFT) (clinical reference for global lung function) and a SPECT ventilation image ( $V_{SPECT}$ ) (clinical reference for regional ventilation). First,  $V_{4DCT}$  defect parameters were quantified and compared with PFT measurements. The  $V_{4DCT}$  defect parameters include: (a) the lowest 25<sup>th</sup> percentile  $V_{4DCT}$  value, (b) absolute defect volume (l), and (c) % defect volume. The PFT measurements include: (1) forced expiratory volume in 1 s ( $FEV_1$ ) (% predicted), and (b)  $FEV_1$ /forced vital capacity (FVC) (%). Second, the  $V_{4DCT}$  images were aligned with the  $V_{SPECT}$  images to compare  $V_{4DCT}$  in  $V_{SPECT}$  defect regions and non-defect regions. Finally,  $V_{4DCT}$  was analyzed for a ventral-to-dorsal gradient and compared with that of  $V_{SPECT}$ .
